# Supplementary figures and images for: Relative contributions of pigments and biophotonic nanostructures to natural color production: a case study in budgerigar (Melopsittacus undulatus) feathers
Source: Oxford University Press journal article supplement (doi:10.1242/jeb.064907), 2012-03-22

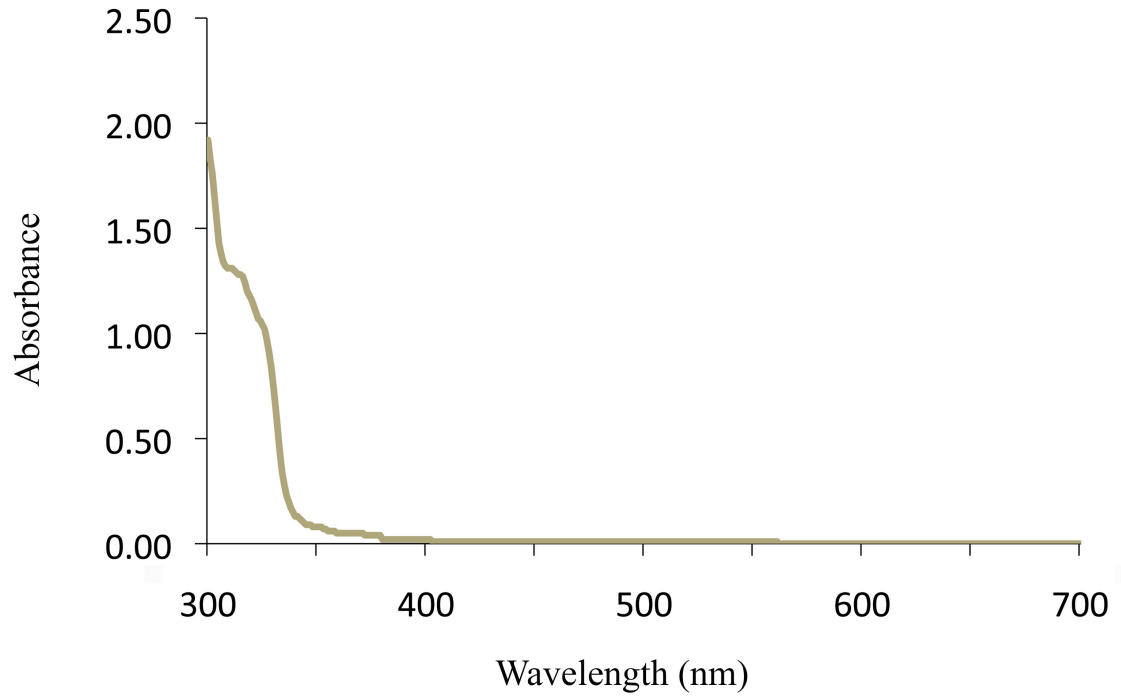

Supplement: jeb064907figs1.pdf [file jeb064907figs1.pdf]
